# Supplementary material for: Potential of known and short prokaryotic protein motifs as a basis for novel peptide-based antibacterial therapeutics: a computational survey
Source: Front Microbiol. 2014 Jan 21;5:4. doi: 10.3389/fmicb.2014.00004 (PMC3896991; doi:10.3389/fmicb.2014.00004)
Supplement: Table S1 — Protein sequence identifiers for each functional category downloaded from the MvirDB. [file DataSheet1.XLSX]

## Sheet: Sheet1
Table S1. Protein sequence identifiers for each functional category downloaded from the MvirDB. Each category consists of two coloumns, a full list of identifiers and a list of unique identifiers where replicate identifiers have been removed.
Adherence		Capsule		Chemotaxis		Effector		Endotoxin		Enzyme		Exotoxin		Lipoprotein		Motility		Siderophore		Type III secretion		Type IV secretion
Full list of identifiers	unique identifiers	Full list of identifiers	unique identifiers	Full list of identifiers	unique identifiers	Full list of identifiers	unique identifiers	Full list of identifiers	unique identifiers	Full list of identifiers	unique identifiers	Full list of identifiers	unique identifiers	Full list of identifiers	unique identifiers	Full list of identifiers	unique identifiers	Full list of identifiers	unique identifiers	Full list of identifiers	unique identifiers	Full list of identifiers	unique identifiers
AAA20524	AAA20524	AAA21682	AAA21682	AAC27623	AAC27623	B7UM99	B7UM99	NP_206844	NP_206844	AAA22907	AAA22907	BP3783	BP3783	A2PX57	A2PX57	BPSS1602	BPSS1602	BMEII0077	BMEII0077	A0B1R2	A0B1R2	BMEII0025	BMEII0025
AAA20524	AAA20525	AAA21682	AAA24046	AAC27623	AAC27624	BPSS1524	BPSS1524	NP_206844	NP_206845	AAA22907	AAA35915	BP3783	BP3784	A6A501	A6A501	BPSS1602	CAD00731	BMEII0077	BMEII0078	A3KSS6	A3KSS6	BMEII0026	BMEII0026
AAA20525	AAA20526	AAA24046	AAA24047	AAC27624	BMEI0324	BPSS1524	BPSS1525	NP_206845	NP_206846	AAA22907	AAC75315	BP3784	BP3787	A7ZV22	A7ZV22	CAD00731	CJJ8425_0609	BMEII0078	BMEII0079	A3LBM9	A3LBM9	BMEII0027	BMEII0027
AAA20525	AAA20527	AAA24046	AAF13660	AAC27624	BMEII0154	BPSS1525	BPSS1529	NP_206845	NP_206958	AAA22907	AAL75506	BP3784	CP0133	AAC73565	AAC73565	CAD00731	FTT0088	BMEII0078	BMEII0080	A3NKV9	A3NKV9	BMEII0028	BMEII0028
AAA20526	AAA20528	AAA24047	AAF13661	BMEI0324	BMEII0155	BPSS1525	BPSS1531	NP_206846	NP_207077	AAA35915	AAN59979	BP3787	MW1889	AAC73565	AAC76538	CJJ8425_0609	FTT1057	BMEII0079	BMEII0081	A3NLE8	A3NLE8	BMEII0029	BMEII0029
AAA20526	AAA20529	AAA24047	AAF13662	BMEI0324	BMEII0156	BPSS1529	BPSS1532	NP_206846	NP_207158	AAA35915	AAN63496	BP3787	NP_249839	AAC76538	AAD13463	FTT0088	NP_206915	BMEII0079	BPSL1774	A3NLM2	A3NLM2	BMEII0030	BMEII0030
AAA20527	AAA21682	AAF13660	AAF13663	BMEII0154	BMEII1109	BPSS1529	CAA57991	NP_206958	NP_207473	AAC75315	AAV85504	CP0133	NP_268582	AAC76538	AAL72325	FTT0088	NP_207396	BMEII0080	BPSL1777	A3P710	A3P710	BMEII0031	BMEII0031
AAA20527	AAA23596	AAF13660	AAP42178	BMEII0155	HP0019	BPSS1531	CP0133	NP_206958	NP_207661	AAC75315	ABF06116	CP0133	NP_268735	AAD13463	AAL72328	FTT1057	NP_231398	BMEII0080	BPSL1778	A3P788	A3P788	BMEII0032	BMEII0032
AAA20528	AAA23614	AAF13661	AAP42179	BMEII0156	HP0391	BPSS1531	E1WAC8	NP_207077	NP_207965	AAL75506	ABF06117	MW1889	NP_268943	AAD13463	AAT01052	FTT1057	NP_249086	BMEII0081	BPSS0581	A4TS02	A4TS02	BMEII0033	BMEII0033
AAA20528	AAA23661	AAF13661	AAP42180	BMEII1109	HP0393	BPSS1532	NP_395155	NP_207077	NP_208207	AAL75506	BAB38485	MW1889	NP_269185	AAL72325	AAT01056	NP_206915	NP_249087	BMEII0081	BPSS0582	A4TST0	A4TST0	BMEII0034	BMEII0034
AAA20529	AAA24046	AAF13662	AAP42181	HP0019	HP0616	BPSS1532	NP_395161	NP_207158	NP_208266	AAN59979	BAB83263	NP_249839	NP_269186	AAL72325	B1EHC5	NP_206915	NP_249099	BPSL1774	BPSS0583	A5J4B8	A5J4B8	BMEII0035	BMEII0035
AAA20529	AAA24047	AAF13662	AAP42182	HP0019	HP0815	CAA57991	NP_395162	NP_207158	NP_275141	AAN59979	BAC77725	NP_249839	NP_269959	AAL72328	B2NQY3	NP_207396	NP_249100	BPSL1774	BPSS0584	A5TN23	A5TN23	BMEII0681	BMEII0681
AAA21682	AAA57451	AAF13663	AAP42183	HP0391	HP0816	CAA57991	NP_395163	NP_207473	NP_438708	AAN63496	BAE73273	NP_268582	NP_269985	AAL72328	B2P2K4	NP_207396	NP_249101	BPSL1777	BPSS0585	A5XLD5	A5XLD5	HP0037	HP0037
AAA21682	AAA57452	AAF13663	AAP42184	HP0391	HP1067	CP0133	NP_395165	NP_207473	NP_438812	AAN63496	BAE75929	NP_268582	NP_607349	AAT01052	B2PJL6	NP_231398	NP_249102	BPSL1777	BPSS0586	A6AM77	A6AM77	HP0037	HP0039m
AAA23596	AAA57453	AAP42178	AAP42185	HP0393	NP_231398	CP0133	NP_395201	NP_207661	NP_439271	AAV85504	BP3783	NP_268735	NP_607350	AAT01052	B3A6I3	NP_231398	NP_250144	BPSL1778	BPSS0587	A6BVN8	A6BVN8	HP0039m	HP0537
AAA23596	AAA57454	AAP42178	AAP42186	HP0393	NP_249101	E1WAC8	NP_395205	NP_207661	NP_439675	AAV85504	BPSL2787	NP_268735	NP_665009	AAT01056	B3AHH6	NP_249086	NP_251805	BPSL1778	BPSS0588	A7K002	A7K002	HP0039m	NP_207317
AAA23614	AAB03707	AAP42179	AAP42187	HP0616	NP_249102	NP_395155	NP_395206	NP_207965	NP_439686	ABF06116	CAA30357	NP_268943	NP_665105	AAT01056	B3B098	NP_249086	NP_273117	BPSS0581	FTT0029c	A8EPE6	A8EPE6	HP0039m	NP_207318
AAA23614	AAB30543	AAP42179	AAP42188	HP0616	NP_249103	NP_395155	NP_460026	NP_207965	NP_439687	ABF06116	CAA33347	NP_268943	P06736	B1EHC5	B3HJJ6	NP_249087	NP_281274	BPSS0581	GBAA1981	A8EPK1	A8EPK1	HP0039m	NP_207319
AAA23661	AAB65153	AAP42180	AAP42189	HP0815	NP_249106	NP_395161	NP_460061	NP_208207	NP_439688	ABF06117	CAA41768	NP_269185	P09983	B2NQY3	B3IGZ6	NP_249087	NP_281279	BPSS0582	GBAA1982	A8EQ19	A8EQ19	HP0537	NP_207320
AAA23661	AAB82330	AAP42180	AAP42190	HP0815	NP_249108	NP_395161	NP_460064	NP_208207	NP_439689	ABF06117	CAA70683	NP_269185	P09986	B2P2K4	B3Y9L1	NP_249099	NP_281527	BPSS0582	HP0876	A8KGH5	A8KGH5	HP0537	NP_207321
AAA24046	AAC38392	AAP42181	AAP42191	HP0816	NP_463123	NP_395162	NP_460194	NP_208266	NP_706257	BAB38485	CAD60196	NP_269186	P11439	B2PJL6	B3YI19	NP_249099	NP_281528	BPSS0583	HP0888	A8KGN6	A8KGN6	NP_207317	NP_207322
AAA24046	AAC44560	AAP42181	AAP42192	HP0816	NP_643579	NP_395162	NP_460358	NP_208266	NP_706258	BAB38485	CAD60199	NP_269186	P13423	B3A6I3	B4AA40	NP_249100	NP_281561	BPSS0583	HP0915	A9AP14	A9AP14	NP_207317	NP_207323
AAA24047	AAC45093	AAP42182	AAP42193	HP1067	O54244	NP_395163	NP_460361	NP_275141	NP_706259	BAB83263	CAD60203	NP_269959	P15377	B3AHH6	B4T2P8	NP_249100	NP_281731	BPSS0584	HP1341	AAL72330	AAL72330	NP_207318	NP_207324
AAA24047	AAC70163	AAP42182	AAP42194	HP1067	O54245	NP_395163	NP_460362	NP_275141	NP_878986	BAB83263	CAG28417	NP_269959	P16535	B3B098	B4TF87	NP_249101	NP_281869	BPSS0584	HP1512	AAL72330	AAL72331	NP_207318	NP_207325
AAA57451	AAD26595	AAP42183	AAP42195	NP_231398	O66891	NP_395165	NP_460363	NP_438708	NP_878987	BAC77725	CAJ32498	NP_269985	P55128	B3HJJ6	B4TSD4	NP_249101	NP_281892	BPSS0585	HP1561	AAL72331	AAL72332	NP_207319	NP_207326
AAA57451	AAD27809	AAP42183	AAP42196	NP_231398	O67495	NP_395165	NP_460365	NP_438708	NP_878988	BAC77725	CAM09174	NP_269985	P55129	B3IGZ6	B5BKG3	NP_249102	NP_282040	BPSS0585	HP1562	AAL72331	B0A0Z9	NP_207319	NP_207327
AAA57452	AAD27810	AAP42184	AAP42197	NP_249101	P06974	NP_395201	NP_460366	NP_438812	NP_878989	BAE73273	EAZ47271	NP_607349	P55130	B3Y9L1	B5BWD6	NP_249102	NP_282458	BPSS0586	NP_285847	AAL72332	B0A3X5	NP_207320	NP_207328
AAA57452	AAD30557	AAP42184	AAP42198	NP_249101	P15070	NP_395201	NP_460367	NP_438812	NP_878990	BAE73273	HP0067	NP_607349	P55131	B3YI19	B5CE00	NP_250144	NP_282459	BPSS0586	NP_285848	AAL72332	B0GMA1	NP_207320	NP_207330
AAA57453	AAD49229	AAP42185	BPSL2792	NP_249102	P23448	NP_395205	NP_460369	NP_439271	NP_878991	BAE75929	HP0068	NP_607349	P62560	B4AA40	B5F2L7	NP_250144	NP_282477	BPSS0587	NP_286309	B0A0Z9	B0GP11	NP_207321	NP_207331
AAA57453	AAK09045	AAP42185	BPSL2795	NP_249102	P23453	NP_395205	NP_460370	NP_439271	NP_878992	BAE75929	HP0069	NP_607349	P62561	B4T2P8	B5FRK9	NP_251805	NP_282478	BPSS0587	NP_286315	B0A3X5	B0HM43	NP_207321	NP_207332
AAA57454	AAK09047	AAP42186	BPSL2802	NP_249103	P24073	NP_395206	NP_460590	NP_439675	NP_878993	BP3783	HP0070	NP_607350	P68884	B4TF87	B5MSV1	NP_251805	NP_282484	BPSS0588	NP_308182	B0GMA1	B0HNJ8	NP_207322	NP_207333
AAA57454	AAK16475	AAP42186	BPSL2805	NP_249103	P26418	NP_395206	NP_460811	NP_439675	NP_878994	BP3783	HP0072	NP_607350	P68885	B4TSD4	B5N6E9	NP_273117	NP_282485	BPSS0588	NP_308183	B0GP11	B0HW38	NP_207322	NP_207334
AAB03707	AAK16476	AAP42187	BPSL2806	NP_249106	P26419	NP_460026	NP_461011	NP_439686	NP_878995	BPSL2787	HP0073	NP_607350	Q00951	B5BKG3	B5N916	NP_273117	NP_282693	FTT0029c	NP_308649	B0HM43	B0HZN9	NP_207323	NP_207335
AAB03707	AAK16477	AAP42187	BPSL2807	NP_249106	P34009	NP_460026	NP_461786	NP_439686		BPSL2787	HP1563	NP_607350	Q57202	B5BWD6	B5NPH8	NP_281274	NP_282855	FTT0029c	NP_308654	B0HNJ8	B1EH66	NP_207323	NP_207336
AAB30543	AAK16478	AAP42188	BPSL2809	NP_249108	P37599	NP_460061	NP_461803	NP_439687		CAA30357	NP_206867	NP_665009	Q57211	B5CE00	B5P929	NP_281274	NP_463735	GBAA1981	NP_370637	B0HW38	B1FBU7	NP_207324	NP_207337
AAB30543	AAK16479	AAP42188	BXB0063	NP_249108	P52610	NP_460061	NP_461866	NP_439687		CAA30357	NP_206868	NP_665009	Q57212	B5F2L7	B5PLT0	NP_281279	NP_794778	GBAA1981	NP_370638	B0HZN9	B1FET0	NP_207324	NP_207338
AAB65153	AAK16480	AAP42189	NP_206977	NP_463123	P52613	NP_460061	O06949	NP_439688		CAA33347	NP_206869	NP_665105	STY3008	B5FRK9	B5PXZ0	NP_281279	NP_858315	GBAA1982	NP_370639	B1EH66	B1FTD1	NP_207325	NP_207339
AAB65153	AAK84126	AAP42189	NP_207124	NP_463123	P74927	NP_460061	O30916	NP_439688		CAA33347	NP_206870	NP_665105	VC1450	B5MSV1	B5Q494	NP_281527	Q56911	GBAA1982	NP_370641	B1FBU7	B1H786	NP_207325	NP_207340
AAB82330	AAL08431	AAP42190	NP_270107	NP_643579	Q03593	NP_460064	O34105	NP_439689		CAA41768	NP_206871	P06736		B5N6E9	B5Z2G0	NP_281527	Q56912	HP0876	NP_370642	B1FET0	B1H8V0	NP_207326	NP_207341
AAB82330	AAL31637	AAP42190	NP_270108	NP_643579	Q04955	NP_460064	O52623	NP_439689		CAA41768	NP_206872	P09983		B5N916	B6I258	NP_281528	YP_001006729	HP0876	NP_370643	B1FTD1	B1JNK0|	NP_207326	NP_207342
AAC38392	AAL79954	AAP42191	NP_270109	O54244	Q44458	NP_460064	O68703	NP_706257		CAA70683	NP_206873	P09986		B5NPH8	B6ZUZ0	NP_281528	YP_095369	HP0888	NP_370644	B1H786	B1T0P5	NP_207327	NP_541002
AAC38392	AAM75261	AAP42191	NP_273131	O54244	Q44903	NP_460064	O68720	NP_706257		CAA70683	NP_208266	P09986		B5P929	B7UPX1	NP_281561	YP_095806	HP0888	NP_370645	B1H8V0	B1T9A8	NP_207327	NP_541003
AAC44560	AAM88295	AAP42192	NP_273132	O54244	Q51466	NP_460194	P17778	NP_706258		CAD60196	NP_216899	P11439		B5PLT0	BMEI0687	NP_281561	YP_095807	HP0915	NP_370646	B1JNK0|	B1T9V0	NP_207328	NP_541004
AAC44560	AAM88296	AAP42192	NP_273133	O54244	Q57259	NP_460194	P74851	NP_706258		CAD60196	NP_216900	P13423		B5PXZ0	BMEII1082	NP_281731	YP_095810	HP0915	NP_370647	B1T0P5	B2H8I0	NP_207328	NP_541005
AAC45093	AAM88297	AAP42193	NP_273134	O54244	Q57511	NP_460358	P74873	NP_706259		CAD60199	NP_231400	P13423		B5Q494	BPSL1802	NP_281731		HP1341	NP_370648	B1T9A8	B2HC91	NP_207330	NP_541006
AAC45093	AAM88298	AAP42193	NP_273135	O54244	Q63J46	NP_460358	Q05608	NP_706259		CAD60199	NP_231419	P13423		B5Z2G0	BPSL1817	NP_281869		HP1341	NP_370649	B1T9V0	B2HCE9	NP_207330	NP_541007
AAC70163	AAO60096	AAP42194	NP_273136	O54244		NP_460361	Q07566	NP_878986		CAD60203	NP_248734	P13423		B6I258	BPSL2026	NP_281869		HP1512	NP_371257	B2H8I0	B2K143	NP_207331	NP_541008
AAD26595	AAQ62648	AAP42194	NP_273137	O54244		NP_460361	Q55286	NP_878986		CAD60203	NP_250401	P15377		B6ZUZ0	BPSS0294	NP_281892		HP1512	NP_371258	B2HC91	B2KAD7	NP_207331	NP_541009
AAD26595	AAQ62649	AAP42195	NP_273138	O54244		NP_460362	Q56019	NP_878987		CAG28417	NP_250403	P16535		B7UPX1	BPSS1550	NP_281892		HP1561	NP_371259	B2HCE9	B2NKH0	NP_207332	NP_541010
AAD27809	AAQ62650	AAP42195	NP_273145	O54244		NP_460362	Q56020	NP_878987		CAG28417	NP_252530	P55128		BMEI0687	BPSS2191	NP_282040		HP1561	NP_371260	B2K143	B2NTX6	NP_207332	NP_541011
AAD27809	AAQ62651	AAP42196	NP_273146	O54244		NP_460363	Q56134	NP_878988		CAJ32498	NP_268936	P55128		BMEI0687	C0Q6B1	NP_282040		HP1562	NP_373350	B2KAD7	B2P1Q5	NP_207333	NP_541012
AAD27810	AAQ62652	AAP42196	NP_282554	O54244		NP_460363	Q56135	NP_878988		CAJ32498	NP_268944	P55129		BMEII1082	C1HQT4	NP_282458		HP1562	NP_373352	B2NKH0	B2PEU5	NP_207333	NP_790379
AAD27810	BAA07174	AAP42197	NP_282555	O54244		NP_460365	Q56931	NP_878989		CAM09174	NP_269065	P55129		BMEII1082	C1MBP9	NP_282458		NP_285847	NP_373354	B2NTX6	B2PHT3	NP_207334	NP_863298
AAD30557	BAA84838	AAP42197	NP_282556	O54244		NP_460365	STM2878	NP_878989		CAM09174	NP_269179	P55130		BPSL1802	C1NB44	NP_282459		NP_285848	NP_373355	B2P1Q5	B3A291	NP_207334	NP_863299
AAD30557	BAA84839	AAP42198	NP_282557	O54245		NP_460366	STY3008	NP_878990		EAZ47271	NP_269520	P55131		BPSL1802	C2IDC9	NP_282459		NP_286309	NP_373356	B2PEU5	B3A2N7	NP_207335	NP_863300
AAD49229	BAA84840	AAP42198	NP_282562	O54245		NP_460366		NP_878990		EAZ47271	NP_269528	P62560		BPSL1817	C2IDG4	NP_282477		NP_286315	NP_373357	B2PHT3	B3AGQ8	NP_207335	NP_863302
AAD49229	BAA84841	BPSL2792	NP_282563	O66891		NP_460367		NP_878991		HP0067	NP_269985	P62560		BPSL1817	C2IEV4	NP_282477		NP_308182	NP_373358	B3A291	B3AXB1	NP_207336	NP_863303
AAK09045	BAA84842	BPSL2792	NP_282564	O66891		NP_460367		NP_878991		HP0067	NP_269989	P62561		BPSL2026	C2JCD4	NP_282478		NP_308183	NP_373359	B3A2N7	B3AXP9	NP_207336	NP_863348
AAK09045	BAA84843	BPSL2795	NP_282565	O66891		NP_460369		NP_878992		HP0068	NP_273462	P62561		BPSL2026	C2JCI0	NP_282478		NP_308649	NP_373360	B3AGQ8	B3INZ0	NP_207337	NP_863349
AAK09047	BAA84844	BPSL2795	NP_282566	O66891		NP_460369		NP_878992		HP0068	NP_282297	P68884		BPSS0294	C2JCN0	NP_282484		NP_308654	NP_373361	B3AXB1	B3Y9Q3	NP_207337	YP_034051
AAK09047	BAA84845	BPSL2802	NP_282567	O66891		NP_460370		NP_878993		HP0069	NP_286008	P68884		BPSS0294	C2JCT2	NP_282484		NP_370637	NP_373857	B3AXP9	B3YJ50	NP_207338	YP_034052
AAK16475	BAA84846	BPSL2802	NP_282568	O66891		NP_460370		NP_878993		HP0069	NP_286311	P68884		BPSS1550	C3NXK3	NP_282485		NP_370638	NP_373945	B3INZ0	B4A0M4	NP_207338	YP_034053
AAK16475	BAA84847	BPSL2805	NP_282570	O66891		NP_460590		NP_878994		HP0070	NP_286313	P68885		BPSS1550	C3NXP6	NP_282485		NP_370639	NP_373946	B3Y9Q3	B4A287	NP_207339	YP_034054
AAK16476	BAA84848	BPSL2805	NP_282571	O66891		NP_460590		NP_878994		HP0070	NP_286321	P68885		BPSS2191	C3NXS5	NP_282693		NP_370641	NP_374250	B3YJ50	B4EN98	NP_207339	YP_034055
AAK16476	BAA84849	BPSL2806	NP_282572	O66891		NP_460811		NP_878995		HP0072	NP_308651	P68885		BPSS2191	C4X184	NP_282693		NP_370642	NP_374251	B4A0M4	B4EYE1	NP_207340	YP_034056
AAK16477	BAA84850	BPSL2806	NP_282573	O66891		NP_460811		NP_878995		HP0072	NP_308660	Q00951		C0Q6B1	C5A1E3	NP_282855		NP_370643	NP_375397	B4A287	B4T425	NP_207340	YP_034057
AAK16477	BAA84851	BPSL2807	NP_282574	O66891		NP_461011				HP0073	NP_344851	Q00951		C1HQT4	C6EDT4	NP_282855		NP_370644	NP_403932	B4EN98	B4T4T5	NP_207341	YP_034058
AAK16478	BPSL1813	BPSL2807	NP_282575	O66891		NP_461011				HP0073	NP_374253	Q57202		C1MBP9	C6S023	NP_463735		NP_370645	NP_405468	B4EYE1	B4TFT7	NP_207341	YP_034059
AAK16478	BPSL1891	BPSL2809	NP_282576	O66891		NP_461786				HP1563	NP_384703	Q57211		C1NB44	C6S058	NP_463735		NP_370646	NP_406852	B4T425	B4TH37	NP_207342	YP_034060
AAK16479	BPSS2197	BPSL2809	NP_282577	O66891		NP_461786				HP1563	NP_384705	Q57211		C2IDC9	C6UHX1	NP_794778		NP_370647	NP_406853	B4T4T5	B4TTT2	NP_207342	YP_034062
AAK16479	BPSS2198	BXB0063	NP_282578	O66891		NP_461803				NP_206867	NP_405468	Q57212		C2IDG4	C6V352	NP_858315		NP_370648	NP_406854	B4TFT7	B4TUV5	NP_541002	YP_034063
AAK16480	CAA45008	NP_206977	NP_282579	O66891		NP_461803				NP_206867	NP_414805	STY3008		C2IEV4	C6YHG1	NP_858315		NP_370649	NP_414693	B4TH37	B5BYY3	NP_541002	YP_034064
AAK16480	CAA48847	NP_206977	NP_282580	O66891		NP_461866				NP_206868	NP_415087	STY3008		C2JCD4	C6YJ67	Q56911		NP_371257	NP_414694	B4TTT2	B5BZV2	NP_541003	YP_034065
AAK84126	CAA48941	NP_207124	NP_282581	O66891		NP_461866				NP_206868	NP_415088	VC1450		C2JCI0	C9XD80	Q56911		NP_371258	NP_414695	B4TUV5	B5CBN7	NP_541003	YP_034066
AAK84126	CAA83535	NP_207124	NP_282582	O66891		O06949				NP_206869	NP_415115	VC1450		C2JCN0	CAA83903	Q56911		NP_371259	NP_415115	B5BYY3	B5CJD6	NP_541004	YP_034067
AAL08431	CAA83901	NP_270107	NP_282583	O66891		O30916				NP_206869	NP_415117			C2JCT2	D0H4F7	Q56911		NP_371260	NP_415120	B5BZV2	B5F3X9	NP_541004	YP_034068
AAL08431	CAA83902	NP_270107	NP_282584	O66891		O30916				NP_206870	NP_415118			C3NXK3	D0HKT2	Q56911		NP_373350	NP_415122	B5CBN7	B5F7A5	NP_541005	YP_034069
AAL31637	CAA83903	NP_270108	NP_282585	O67495		O34105				NP_206870	NP_415126			C3NXP6	D0HLK8	Q56912		NP_373352	NP_415209	B5CJD6	B5FIK5	NP_541005	YP_034251
AAL31637	CAA83904	NP_270108	NP_282586	O67495		O52623				NP_206871	NP_416758			C3NXS5	D0HLN3	Q56912		NP_373354	NP_418707	B5F3X9	B5FT47	NP_541006	YP_034253
AAL79954	CAA83905	NP_270109	NP_282587	O67495		O68703				NP_206871	NP_455458			C4X184	D0HUG0	Q56912		NP_373355	NP_418708	B5F7A5	B5MNE6	NP_541006	YP_034254
AAL79954	CAB94853	NP_270109	NP_282588	P06974		O68703				NP_206872	NP_458702			C5A1E3	D0HVA4	Q56912		NP_373356	NP_418709	B5FIK5	B5NAM7	NP_541007	YP_034255
AAM75261	CAD12883	NP_273131	NP_344879	P06974		O68720				NP_206872	NP_459945			C6EDT4	D0IIL9	Q56912		NP_373357	NP_459197	B5FT47	B5NBM8	NP_541007	YP_034256
AAM75261	CAD66177	NP_273131	NP_344880	P15070		O68720				NP_206873	NP_463734			C6S023	D2NFS9	YP_001006729		NP_373358	NP_459582	B5MNE6	B5NNS5	NP_541008	YP_034257
AAM88295	NP_109829	NP_273132	NP_344881	P15070		O68720				NP_206873	NP_487513			C6S058	FTT1057c	YP_001006729		NP_373359	NP_644901	B5NAM7	B5NZJ4	NP_541008	YP_034258
AAM88295	NP_109830	NP_273132	NP_344882	P23448		O68720				NP_208266	NP_487515			C6UHX1	FTT1157c	YP_095369		NP_373360	NP_644903	B5NBM8	B5P3Q2	NP_541009	YP_034259
AAM88296	NP_109997	NP_273133	NP_344883	P23448		P17778				NP_208266	NP_487516			C6V352	GBAA1041	YP_095369		NP_373361	NP_644905	B5NNS5	B5PGN9	NP_541009	YP_034260
AAM88296	NP_109998	NP_273133	NP_344884	P23448		P17778				NP_216899	NP_487517			C6YHG1	GBAA1169	YP_095806		NP_373857	NP_644906	B5NZJ4	B5PL35	NP_541010	YP_034261
AAM88297	NP_110135	NP_273134	NP_344885	P23448		P74851				NP_216899	NP_519821			C6YJ67	GBAA2336	YP_095806		NP_373945	NP_644907	B5P3Q2	B5PUE0	NP_541010	YP_034262
AAM88297	NP_110140	NP_273134	NP_344886	P23448		P74851				NP_216900	NP_561089			C9XD80	HP0037	YP_095807		NP_373946	NP_644908	B5PGN9	B5PZ13	NP_541011	YP_034263
AAM88298	NP_110141	NP_273135	NP_344890	P23448		P74873				NP_216900	NP_561107			CAA83903	HP0325	YP_095807		NP_374250	NP_644909	B5PL35	B5Q7M0	NP_541011	YP_034264
AAM88298	NP_110256	NP_273135	NP_344891	P23448		P74873				NP_231400	NP_561469			CAA83903	HP0797	YP_095810		NP_374251	NP_644910	B5PUE0	B5QCG9	NP_541012	YP_034265
AAO60096	NP_206811	NP_273136	NP_344892	P23448		Q05608				NP_231400	NP_561641			D0H4F7	K96243	YP_095810		NP_375397	NP_644911	B5PZ13	B5Z4J1	NP_541012	YP_034266
AAO60096	NP_207519	NP_273136	NP_344893	P23448		Q07566				NP_231419	NP_561762			D0HKT2	NP_108246			NP_403932	NP_644912	B5Q7M0	B6ZQS6	NP_790379	YP_034267
AAQ62648	NP_218321	NP_273137	NP_395427	P23448		Q55286				NP_231419	NP_561797			D0HLK8	NP_207328			NP_405468	NP_645514	B5QCG9	B7CZ07	NP_790379	YP_034268
AAQ62648	NP_223551	NP_273137	NP_395428	P23448		Q56019				NP_248734	NP_562150			D0HLN3	NP_214946			NP_405468	NP_645515	B5Z4J1	B7CZ87	NP_863298	YP_034269
AAQ62649	NP_223882	NP_273138	NP_395429	P23448		Q56020				NP_248734	NP_562195			D0HUG0	NP_218280			NP_405468	NP_709455	B6ZQS6	B7CZG1	NP_863298	YP_034270
AAQ62649	NP_230473	NP_273138	NP_395430	P23448		Q56134				NP_250401	NP_562439			D0HVA4	NP_220074			NP_405468	NP_709456	B7CZ07	B8DMS7	NP_863299	YP_034271
AAQ62650	NP_230474	NP_273145	NP_458731	P23448		Q56135				NP_250401	NP_607775			D0IIL9	NP_230479			NP_406852	NP_753164	B7CZ87	B9CE55	NP_863299	YP_034272
AAQ62650	NP_230475	NP_273145	NP_458734	P23453		Q56931				NP_250403	NP_638326			D2NFS9	NP_250709			NP_406853	NP_810722	B7CZG1	BPSS1390	NP_863300
AAQ62651	NP_230476	NP_273146	NP_644939	P23453		Q56931				NP_250403	NP_644939			FTT1057c	NP_273135			NP_406854	NP_810723	B8DMS7	BPSS1391	NP_863300
AAQ62651	NP_230477	NP_273146	NP_644940	P24073		Q56931				NP_252530	NP_644940			FTT1057c	NP_273507			NP_414693	NP_810724	B9CE55	BPSS1392	NP_863302
AAQ62652	NP_230478	NP_282554	NP_644941	P24073		Q56931				NP_252530	NP_644941			FTT1157c	NP_281561			NP_414694	NP_810725	BPSS1390	BPSS1393	NP_863302
AAQ62652	NP_230479	NP_282554	NP_644942	P26418		STM2878				NP_268936	NP_644942			FTT1157c	NP_281859			NP_414695	NP_810726	BPSS1390	BPSS1394	NP_863303
BAA07174	NP_230480	NP_282555	NP_644943	P26418		STM2878				NP_268936	NP_644943			GBAA1041	NP_282133			NP_415115	NP_810727	BPSS1391	BPSS1395	NP_863303
BAA07174	NP_230481	NP_282555	NP_644944	P26419		STY3008				NP_268944	NP_644944			GBAA1041	NP_309120			NP_415120	NP_810728	BPSS1391	BPSS1396	NP_863348
BAA84838	NP_230482	NP_282556	NP_644945	P26419		STY3008				NP_268944	NP_644945			GBAA1169	NP_310766			NP_415122	NP_810729	BPSS1392	BPSS1397	NP_863348
BAA84838	NP_230483	NP_282556	NP_644946	P34009						NP_269065	NP_644946			GBAA1169	NP_346089			NP_415209	NP_811056	BPSS1392	BPSS1398	NP_863349
BAA84839	NP_230484	NP_282557	NP_644947	P34009						NP_269065	NP_644947			GBAA2336	NP_370637			NP_418707	NP_811057	BPSS1393	BPSS1399	NP_863349
BAA84839	NP_230485	NP_282557	NP_644948	P37599						NP_269179	NP_644948			GBAA2336	NP_370638			NP_418708	NP_811058	BPSS1393	BPSS1400	YP_034051
BAA84840	NP_230486	NP_282562	NP_644949	P37599						NP_269179	NP_644949			HP0037	NP_370639			NP_418709	NP_811059	BPSS1394	BPSS1401	YP_034051
BAA84840	NP_230487	NP_282562	NP_644950	P37599						NP_269520	NP_644950			HP0037	NP_371260			NP_459197	NP_811060	BPSS1394	BPSS1402	YP_034052
BAA84841	NP_230488	NP_282563	NP_644951	P52610						NP_269520	NP_644951			HP0325	NP_371657			NP_459582	NP_811061	BPSS1395	BPSS1403	YP_034052
BAA84841	NP_230489	NP_282563	NP_644952	P52610						NP_269528	NP_644952			HP0325	NP_373350			NP_644901	NP_831748	BPSS1395	BPSS1404	YP_034053
BAA84842	NP_230492	NP_282564	NP_644953	P52610						NP_269528	NP_644953			HP0797	NP_373352			NP_644903	NP_844387	BPSS1396	BPSS1405	YP_034053
BAA84842	NP_230493	NP_282564	NP_644954	P52610						NP_269985	NP_644954			HP0797	NP_373946			NP_644905	NP_844388	BPSS1396	BPSS1406	YP_034054
BAA84843	NP_231102	NP_282565	NP_688167	P52610						NP_269985	NP_645114			K96243	NP_388380			NP_644906	O25899	BPSS1397	BPSS1407	YP_034054
BAA84843	NP_249086	NP_282565	NP_688168	P52610						NP_269989	NP_645747			K96243	NP_395182			NP_644907	P74965	BPSS1397	BPSS1408	YP_034055
BAA84844	NP_249087	NP_282566	NP_688169	P52610						NP_269989	NP_645748			K96243	NP_395193			NP_644908	YPO0281	BPSS1398	BPSS1521	YP_034055
BAA84844	NP_249099	NP_282566	NP_688170	P52610						NP_273462	NP_645749			K96243	NP_403914			NP_644909	YPO1906	BPSS1398	BPSS1522	YP_034056
BAA84845	NP_249100	NP_282567	NP_688171	P52610						NP_273462	NP_646946			NP_108246	NP_405474			NP_644910	YPO1907	BPSS1399	BPSS1523	YP_034056
BAA84845	NP_249101	NP_282567	NP_688172	P52610						NP_282297	NP_647375			NP_108246	NP_414785			NP_644911	YPO1908	BPSS1399	BPSS1524	YP_034057
BAA84846	NP_249102	NP_282568	NP_688173	P52610						NP_282297	NP_687233			NP_207328	NP_414996			NP_644912	YPO1913	BPSS1400	BPSS1525	YP_034057
BAA84846	NP_249103	NP_282568	NP_688174	P52610						NP_286008	NP_688206			NP_207328	NP_415089			NP_645514	YPO1914	BPSS1400	BPSS1526	YP_034058
BAA84847	NP_249104	NP_282570	NP_688175	P52610						NP_286008	NP_696631			NP_214946	NP_417970			NP_645515	YPO1916	BPSS1401	BPSS1528	YP_034058
BAA84847	NP_249105	NP_282570	NP_688176	P52610						NP_286311	NP_706441			NP_214946	NP_418504			NP_709455	YPO3390	BPSS1401	BPSS1529	YP_034059
BAA84848	NP_249106	NP_282571	NP_688177	P52613						NP_286313	NP_734663			NP_218280	NP_455449			NP_709455	YPO3392	BPSS1402	BPSS1531	YP_034059
BAA84848	NP_249107	NP_282571	NP_688178	P52613						NP_286321	NP_752599			NP_218280	NP_455466			NP_709456	YP_096795	BPSS1402	BPSS1532	YP_034060
BAA84849	NP_249108	NP_282572	NP_688179	P52613						NP_308651	NP_760898			NP_220074	NP_455517			NP_709456		BPSS1403	BPSS1533	YP_034060
BAA84849	NP_249783	NP_282572	NP_688180	P52613						NP_308660	NP_760903			NP_220074	NP_455563			NP_753164		BPSS1403	BPSS1534	YP_034062
BAA84850	NP_249788	NP_282573	NP_688181	P52613						NP_344851	NP_771652			NP_230479	NP_458630			NP_753164		BPSS1404	BPSS1535	YP_034062
BAA84850	NP_249790	NP_282573	NP_688182	P74927						NP_344851	NP_796767			NP_230479	NP_458656			NP_810722		BPSS1404	BPSS1536	YP_034063
BAA84851	NP_250145	NP_282574	NP_688183	P74927						NP_374253	NP_796774			NP_250709	NP_458734			NP_810723		BPSS1405	BPSS1537	YP_034063
BAA84851	NP_251805	NP_282574	NP_688184	Q03593						NP_384703	NP_805728			NP_250709	NP_459937			NP_810724		BPSS1405	BPSS1538	YP_034064
BPSL1813	NP_252494	NP_282575	P19390	Q03593						NP_384703	NP_811502			NP_273135	NP_460374			NP_810725		BPSS1406	BPSS1539	YP_034064
BPSL1813	NP_253215	NP_282575	P19391	Q04955						NP_384705	NP_811562			NP_273135	NP_461792			NP_810726		BPSS1406	BPSS1540	YP_034065
BPSL1891	NP_253216	NP_282576	P19579	Q04955						NP_384705	NP_814561			NP_273507	NP_461821			NP_810727		BPSS1407	BPSS1541	YP_034065
BPSL1891	NP_253217	NP_282576	P22235	Q04955						NP_405468	NP_815515			NP_273507	NP_463738			NP_810728		BPSS1407	BPSS1542	YP_034066
BPSS2197	NP_253218	NP_282577	P26948	Q04955						NP_405468	NP_815516			NP_281561	NP_465369			NP_810729		BPSS1408	BPSS1543	YP_034066
BPSS2197	NP_253236	NP_282577	P32015	Q04955						NP_414805	NP_815683			NP_281561	NP_465372			NP_811056		BPSS1408	BPSS1544	YP_034067
BPSS2198	NP_253237	NP_282578	P39858	Q04955						NP_414805	NP_816637			NP_281859	NP_519822			NP_811057		BPSS1521	BPSS1545	YP_034067
BPSS2198	NP_253239	NP_282578		Q04955						NP_415087	NP_816984			NP_281859	NP_630888			NP_811058		BPSS1521	BPSS1546	YP_034068
CAA45008	NP_253240	NP_282579		Q04955						NP_415087	NP_836214			NP_282133	NP_630941			NP_811059		BPSS1522	BPSS1547	YP_034068
CAA45008	NP_253241	NP_282579		Q04955						NP_415088	NP_863643			NP_282133	NP_630950			NP_811060		BPSS1522	BPSS1548	YP_034069
CAA48847	NP_253242	NP_282580		Q04955						NP_415088	NP_878008			NP_309120	NP_644901			NP_811061		BPSS1523	BPSS1549	YP_034069
CAA48847	NP_253243	NP_282580		Q04955						NP_415115	O07126			NP_309120	NP_644903			NP_831748		BPSS1523	BPSS1550	YP_034251
CAA48941	NP_253244	NP_282581		Q04955						NP_415117	O26010			NP_310766	NP_645515			NP_844387		BPSS1524	BPSS1551	YP_034251
CAA48941	NP_253245	NP_282581		Q04955						NP_415118	O30387			NP_310766	NP_687122			NP_844388		BPSS1524	BPSS1592	YP_034253
CAA83535	NP_253246	NP_282582		Q04955						NP_415126	O34797			NP_346089	NP_687241			O25899		BPSS1525	BPSS1614	YP_034253
CAA83535	NP_253675	NP_282582		Q44458						NP_416758	O42207			NP_346089	NP_687280			O25899		BPSS1525	BPSS1615	YP_034254
CAA83901	NP_253696	NP_282583		Q44458						NP_416758	O51508			NP_370637	NP_734671			O25899		BPSS1526	BPSS1616	YP_034254
CAA83901	NP_253697	NP_282583		Q44458						NP_455458	O52325			NP_370638	NP_790380			O25899		BPSS1526	BPSS1617	YP_034255
CAA83902	NP_253698	NP_282584		Q44458						NP_455458	O66614			NP_370639	NP_805624			O25899		BPSS1528	BPSS1618	YP_034255
CAA83902	NP_253699	NP_282584		Q44458						NP_458702	O69251			NP_371260	NP_805670			P74965		BPSS1528	BPSS1619	YP_034256
CAA83903	NP_253727	NP_282585		Q44458						NP_458702	O69466			NP_371657	NP_805720			P74965		BPSS1529	BPSS1620	YP_034256
CAA83903	NP_253728	NP_282585		Q44458						NP_459945	O73800			NP_373350	NP_805737			P74965		BPSS1529	BPSS1621	YP_034257
CAA83904	NP_253729	NP_282586		Q44458						NP_459945	O83018			NP_373352	NP_807866			P74965		BPSS1531	BPSS1622	YP_034257
CAA83904	NP_253730	NP_282586		Q44458						NP_463734	O83307			NP_373946	NP_815743			P74965		BPSS1531	BPSS1623	YP_034258
CAA83905	NP_253731	NP_282587		Q44458						NP_463734	O87685			NP_388380	NP_816134			P74965		BPSS1532	BPSS1624	YP_034258
CAA83905	NP_269190	NP_282587		Q44458						NP_487513	O87807			NP_388380	NP_816155			P74965		BPSS1532	BPSS1625	YP_034259
CAB94853	NP_273084	NP_282588		Q44458						NP_487513	O93421			NP_395182	NP_816156			P74965		BPSS1533	BPSS1626	YP_034259
CAB94853	NP_273085	NP_282588		Q44458						NP_487515	P00484			NP_395182	NP_879578			P74965		BPSS1533	BPSS1627	YP_034260
CAD12883	NP_273086	NP_344879		Q44458						NP_487515	P00486			NP_395193	O06522			P74965		BPSS1534	BPSS1628	YP_034260
CAD12883	NP_273087	NP_344879		Q44903						NP_487516	P00487			NP_395193	O25750			P74965		BPSS1534	BPSS1629	YP_034261
CAD66177	NP_273088	NP_344880		Q44903						NP_487516	P00800			NP_403914	O31036			P74965		BPSS1535	C0Y4I5	YP_034261
CAD66177	NP_273089	NP_344880		Q51466						NP_487517	P01021			NP_403914	O34385			P74965		BPSS1535	C0YB84	YP_034262
NP_109829	NP_273090	NP_344881		Q51466						NP_487517	P04971			NP_405474	O52311			P74965		BPSS1536	C0YD38	YP_034262
NP_109829	NP_273091	NP_344881		Q57259						NP_519821	P05057			NP_405474	O67903			YPO0281		BPSS1536	C2LLV3	YP_034263
NP_109830	NP_273092	NP_344882		Q57259						NP_519821	P05620			NP_405474	O85225			YPO0281		BPSS1537	C4B391	YP_034263
NP_109830	NP_273117	NP_344882		Q57511						NP_561089	P05806			NP_405474	O85277			YPO1906		BPSS1537	C4H0X9	YP_034264
NP_109997	NP_273378	NP_344883		Q57511						NP_561089	P07641			NP_414785	O87120			YPO1906		BPSS1538	C4HHU7	YP_034264
NP_109997	NP_273381	NP_344883		Q63J46						NP_561107	P08838			NP_414785	P00808			YPO1907		BPSS1538	C4HQW7	YP_034265
NP_109998	NP_273382	NP_344884								NP_561107	P08839			NP_414996	P06548			YPO1907		BPSS1539	C4I5M8	YP_034265
NP_109998	NP_273677	NP_344884								NP_561469	P08988			NP_414996	P07021			YPO1908		BPSS1539	C4I6L6	YP_034266
NP_110135	NP_274534	NP_344885								NP_561469	P09885			NP_415089	P08715			YPO1908		BPSS1540	C4I782	YP_034266
NP_110135	NP_274708	NP_344885								NP_561641	P09958			NP_415089	P09983			YPO1913		BPSS1540	C5B9Q4	YP_034267
NP_110140	NP_274709	NP_344886								NP_561641	P10051			NP_417970	P10324			YPO1913		BPSS1541	C5U3Q8	YP_034267
NP_110140	NP_274920	NP_344886								NP_561762	P11504			NP_417970	P14013			YPO1914		BPSS1541	C5ZPM8	YP_034268
NP_110141	NP_274922	NP_344890								NP_561762	P15754			NP_418504	P15318			YPO1914		BPSS1542	C5ZU35	YP_034268
NP_110141	NP_274923	NP_344890								NP_561797	P16519			NP_418504	P15377			YPO1916		BPSS1542	C5ZUP9	YP_034269
NP_110256	NP_282073	NP_344891								NP_561797	P18958			NP_455449	P16462			YPO1916		BPSS1543	C6U5I2	YP_034269
NP_110256	NP_282133	NP_344891								NP_562150	P19650			NP_455449	P16535			YPO3390		BPSS1543	C6U6G4	YP_034270
NP_206811	NP_282281	NP_344892								NP_562150	P20074			NP_455466	P17739			YPO3390		BPSS1544	C6U734	YP_034270
NP_206811	NP_282282	NP_344892								NP_562195	P20092			NP_455466	P18585			YPO3392		BPSS1544	C6USW9	YP_034271
NP_207519	NP_282283	NP_344893								NP_562195	P22610			NP_455517	P21355			YPO3392		BPSS1545	C9NP33	YP_034271
NP_207519	NP_282284	NP_344893								NP_562439	P22615			NP_455517	P22606			YP_096795		BPSS1545	CAG17536	YP_034272
NP_218321	NP_282285	NP_395427								NP_562439	P22616			NP_455563	P24327			YP_096795		BPSS1546	CP0133	YP_034272
NP_218321	NP_282286	NP_395427								NP_607775	P22782			NP_455563	P26493					BPSS1546	D0JD82
NP_223551	NP_282287	NP_395428								NP_607775	P23181			NP_458630	P27606					BPSS1547	D0JMQ6
NP_223551	NP_282288	NP_395428								NP_638326	P23188			NP_458630	P31304					BPSS1547	D0M1W1
NP_223882	NP_282289	NP_395429								NP_638326	P23364			NP_458656	P31305					BPSS1548	D0X003
NP_223882	NP_282290	NP_395429								NP_644939	P23377			NP_458656	P33209					BPSS1548	D0Z4V5
NP_230473	NP_282291	NP_395430								NP_644939	P23388			NP_458734	P37665					BPSS1549	D1P129
NP_230473	NP_282292	NP_395430								NP_644940	P23533			NP_458734	P41786					BPSS1549	D1U2G1
NP_230474	NP_282293	NP_458731								NP_644940	P23536			NP_458734	P42363					BPSS1550	D1UMI2
NP_230474	NP_282294	NP_458731								NP_644941	P25309			NP_458734	P42364					BPSS1550	NP_219594
NP_230475	NP_282295	NP_458731								NP_644941	P25910			NP_459937	P47291					BPSS1551	NP_220076
NP_230475	NP_282296	NP_458731								NP_644942	P25960			NP_459937	P52477					BPSS1551	NP_220077
NP_230476	NP_282297	NP_458734								NP_644942	P26825			NP_460374	P55111					BPSS1592	NP_220188
NP_230476	NP_282298	NP_458734								NP_644943	P26826			NP_460374	P55117					BPSS1614	NP_220191
NP_230477	NP_282406	NP_458734								NP_644943	P27717			NP_461792	P55118					BPSS1614	NP_220384
NP_230477	NP_282554	NP_458734								NP_644944	P29119			NP_461792	P55123					BPSS1615	NP_250381
NP_230478	NP_282555	NP_644939								NP_644944	P29122			NP_461821	P55128					BPSS1615	NP_250382
NP_230478	NP_282556	NP_644939								NP_644945	P29808			NP_461821	P55129					BPSS1616	NP_250383
NP_230479	NP_282557	NP_644940								NP_644945	P29990			NP_463738	P55130					BPSS1616	NP_250384
NP_230479	NP_282562	NP_644940								NP_644946	P30299			NP_463738	P55131					BPSS1617	NP_250385
NP_230480	NP_282563	NP_644941								NP_644946	P30432			NP_465369	P55714					BPSS1617	NP_250386
NP_230480	NP_282564	NP_644941								NP_644947	P31585			NP_465369	P69973					BPSS1618	NP_250387
NP_230481	NP_282565	NP_644942								NP_644947	P31586			NP_465372	P72415					BPSS1618	NP_250388
NP_230481	NP_282566	NP_644942								NP_644948	P31587			NP_465372	P74852					BPSS1619	NP_250389
NP_230482	NP_282567	NP_644943								NP_644948	P31698			NP_519822	P75056					BPSS1619	NP_250390
NP_230482	NP_282568	NP_644943								NP_644949	P31699			NP_519822	P80152					BPSS1620	NP_250391
NP_230483	NP_282570	NP_644944								NP_644949	P31700			NP_630888	Q00951					BPSS1620	NP_250392
NP_230483	NP_282571	NP_644944								NP_644950	P31701			NP_630888	Q01251					BPSS1621	NP_250393
NP_230484	NP_282572	NP_644945								NP_644950	P31704			NP_630941	Q04851					BPSS1621	NP_250396
NP_230484	NP_282573	NP_644945								NP_644951	P31705			NP_630941	Q04968					BPSS1622	NP_250397
NP_230485	NP_282574	NP_644946								NP_644951	P31711			NP_630950	Q06081					BPSS1622	NP_250407
NP_230485	NP_282575	NP_644946								NP_644952	P31712			NP_630950	Q06228					BPSS1623	NP_250416
NP_230486	NP_282576	NP_644947								NP_644952	P33566			NP_644901	Q08790					BPSS1623	NP_290283
NP_230486	NP_282577	NP_644947								NP_644953	P33589			NP_644903	Q09086					BPSS1624	NP_395169
NP_230487	NP_282578	NP_644948								NP_644953	P36328			NP_645515	Q09087					BPSS1624	NP_395170
NP_230487	NP_282579	NP_644948								NP_644954	P36642			NP_687122	Q09089					BPSS1625	NP_395171
NP_230488	NP_282580	NP_644949								NP_644954	P36883			NP_687122	Q09090					BPSS1625	NP_395174
NP_230488	NP_282581	NP_644949								NP_645114	P37177			NP_687241	Q0T9P0					BPSS1626	NP_395175
NP_230489	NP_282582	NP_644950								NP_645114	P42014			NP_687241	Q43892					BPSS1626	NP_395176
NP_230489	NP_282583	NP_644950								NP_645747	P43922			NP_687280	Q44342					BPSS1627	NP_395177
NP_230492	NP_282584	NP_644951								NP_645747	P44805			NP_687280	Q44645					BPSS1627	NP_395178
NP_230492	NP_282585	NP_644951								NP_645748	P45595			NP_734671	Q44675					BPSS1628	NP_395179
NP_230493	NP_282586	NP_644952								NP_645748	P45597			NP_734671	Q44676					BPSS1628	NP_395180
NP_230493	NP_282587	NP_644952								NP_645749	P45616			NP_790380	Q44738					BPSS1629	NP_395181
NP_231102	NP_282588	NP_644953								NP_645749	P45617			NP_790380	Q44936					BPSS1629	NP_395185
NP_231102	NP_282616	NP_644953								NP_646946	P45794			NP_805624	Q44957					C0Y4I5	NP_395186
NP_249086	NP_286006	NP_644954								NP_646946	P47668			NP_805624	Q44959					C0YB84	NP_395187
NP_249086	NP_286007	NP_644954								NP_647375	P51183			NP_805670	Q44960					C0YD38	NP_395188
NP_249087	NP_286008	NP_688167								NP_647375	P57296			NP_805670	Q44961					C2LLV3	NP_395189
NP_249087	NP_286009	NP_688167								NP_687233	P62577			NP_805720	Q44974					C4B391	NP_395190
NP_249099	NP_286010	NP_688168								NP_687233	P62579			NP_805720	Q44975					C4H0X9	NP_395191
NP_249099	NP_286011	NP_688168								NP_688206	P63239			NP_805737	Q45034					C4HHU7	NP_395192
NP_249100	NP_287515	NP_688169								NP_688206	P68515			NP_805737	Q45039					C4HQW7	NP_395193
NP_249100	NP_290259	NP_688169								NP_696631	P71154			NP_807866	Q45191					C4I5M8	NP_395194
NP_249101	NP_344916	NP_688170								NP_696631	P72640			NP_807866	Q45194					C4I6L6	NP_395195
NP_249101	NP_345414	NP_688170								NP_706441	P74872			NP_815743	Q45195					C4I782	NP_395196
NP_249102	NP_345446	NP_688171								NP_734663	P75168			NP_815743	Q45196					C5B9Q4	NP_403907
NP_249102	NP_346601	NP_688171								NP_734663	P77439			NP_816134	Q46036					C5U3Q8	NP_403909
NP_249103	NP_346612	NP_688172								NP_752599	P81661			NP_816155	Q46123					C5ZPM8	NP_403911
NP_249103	NP_359024	NP_688172								NP_752599	P82981			NP_816155	Q46668					C5ZU35	NP_403912
NP_249104	NP_404896	NP_688173								NP_760898	P84787			NP_816156	Q46716					C5ZUP9	NP_403913
NP_249105	NP_404897	NP_688173								NP_760898	P84788			NP_816156	Q47262					C6U5I2	NP_403914
NP_249105	NP_404899	NP_688174								NP_760903	P85109			NP_879578	Q47958					C6U6G4	NP_403916
NP_249106	NP_404900	NP_688174								NP_760903	P86171			NP_879578	Q51397					C6U734	NP_403918
NP_249106	NP_438494	NP_688175								NP_771652	PA3841			O06522	Q51487					C6USW9	NP_403919
NP_249107	NP_459538	NP_688175								NP_771652	Q01564			O25750	Q51886					C9NP33	NP_403921
NP_249107	NP_459539	NP_688176								NP_796767	Q01565			O25750	Q52081					CAG17536	NP_403922
NP_249108	NP_459540	NP_688176								NP_796767	Q02736			O31036	Q52492					CAG17536	NP_403923
NP_249108	NP_459541	NP_688177								NP_796774	Q03026			O31036	Q52950					CP0133	NP_403924
NP_249783	NP_459542	NP_688177								NP_796774	Q03058			O34385	Q53891					CP0133	NP_403925
NP_249783	NP_459543	NP_688178								NP_805728	Q06277			O52311	Q55288					D0JD82	NP_460371
NP_249788	NP_459544	NP_688178								NP_805728	Q28193			O52311	Q57272					D0JMQ6	NP_460372
NP_249788	NP_459545	NP_688179								NP_811502	Q41358			O67903	Q57506					D0M1W1	NP_460373
NP_249790	NP_459547	NP_688179								NP_811502	Q46525			O67903	Q5NFW3					D0X003	NP_460376
NP_249790	NP_460110	NP_688180								NP_811562	Q51448			O85225	Q98QL5					D0Z4V5	NP_460377
NP_250145	NP_460111	NP_688180								NP_811562	Q51449			O85225	Q9KMC1					D1P129	NP_460378
NP_250145	NP_460112	NP_688181								NP_814561	Q51451			O85277	Q9KMF4					D1U2G1	NP_460380
NP_251805	NP_460114	NP_688181								NP_814561	Q52177			O85277	Q9KMJ6					D1UMI2	NP_460381
NP_251805	NP_460115	NP_688182								NP_815515	Q52424			O87120	YPO1913					NP_219594	NP_460382
NP_252494	NP_460116	NP_688182								NP_815515	Q54478			P00808	YP_001007666					NP_219594	NP_460383
NP_252494	NP_461448	NP_688183								NP_815516	Q55235			P00808	YP_001007668					NP_220076	NP_460384
NP_253215	NP_461449	NP_688183								NP_815516	Q55435			P00808	YP_001026319					NP_220076	NP_460385
NP_253215	NP_461452	NP_688184								NP_815683	Q56740			P06548	YP_001058924					NP_220077	NP_460386
NP_253216	NP_462537	NP_688184								NP_815683	Q56763			P07021	YP_001066168					NP_220077	NP_857921
NP_253216	NP_462538	P19390								NP_816637	Q63415			P08715	YP_001080406					NP_220188	NP_857925
NP_253217	NP_462539	P19390								NP_816637	Q68749			P09983	YP_001116030					NP_220188	NP_857926
NP_253217	NP_462540	P19390								NP_816984	Q8YJ96			P10324	YP_001348629					NP_220191	NP_857935
NP_253218	NP_462541	P19390								NP_816984	Q91053			P14013	YP_001465584					NP_220191	NP_880879
NP_253218	NP_462656	P19390								NP_836214	Q9HY55			P14013	YP_001583351					NP_220384	NP_880881
NP_253236	NP_465354	P19390								NP_863643	Q9PDH7			P15318	YP_096679					NP_220384	NP_880882
NP_253236	NP_466081	P19390								NP_863643	SA0983			P15318	YP_108401					NP_250381	NP_880883
NP_253237	NP_490508	P19390								NP_878008	STY3008			P15377	YP_108403					NP_250381	NP_880884
NP_253237	NP_490509	P19390								NP_878008	VC1450			P16462	YP_333452					NP_250382	NP_880885
NP_253239	NP_490510	P19390								O07126	YPO1231			P16535	YP_371057					NP_250382	NP_880887
NP_253239	NP_490511	P19390								O26010	YPO1907			P17739	YP_442964					NP_250383	NP_880888
NP_253240	NP_645333	P19390								O26010	YPO2665			P18585	YP_442966					NP_250383	NP_880889
NP_253240	NP_645334	P19390								O26010	YPO2666			P21355	YP_622885					NP_250384	NP_880891
NP_253241	NP_645335	P19390								O26010	YPO2667			P22606	YP_776581					NP_250384	NP_880892
NP_253241	NP_645581	P19391								O26010	YP_001463602			P22606	YP_791220					NP_250385	NP_880904
NP_253242	NP_646186	P19391								O26010	YP_094827			P24327	YP_838976					NP_250385	NP_880905
NP_253242	NP_647237	P19391								O26010	YP_095553			P24327	YP_992988					NP_250386	NP_880907
NP_253243	NP_647238	P19391								O26010	YP_695432			P24327	ZP_01556718					NP_250386	O30527
NP_253243	NP_647368	P19391								O30387	ZP_00708525			P26493	ZP_01563887					NP_250387	O52128
NP_253244	NP_647402	P19391								O34797	ZP_00717088			P27606	ZP_01645454					NP_250387	O52130
NP_253244	NP_647403	P19391								O34797	ZP_01174698			P31304	ZP_01645970					NP_250388	O52136
NP_253245	NP_647404	P19391								O34797	ZP_01175306			P31305	ZP_01699155					NP_250388	O68258
NP_253245	NP_647405	P19391								O34797				P33209	ZP_02100626					NP_250389	O84566
NP_253246	NP_647406	P19391								O42207				P37665	ZP_02108904					NP_250389	O84567
NP_253246	NP_647429	P19391								O42207				P41786						NP_250390	O84568
NP_253675	NP_663902	P19391								O51508				P42363						NP_250390	O84580
NP_253675	NP_663908	P19391								O52325				P42364						NP_250391	O85300
NP_253696	NP_688199	P19391								O52325				P47291						NP_250391	O85636
NP_253696	NP_688239	P19579								O66614				P52477						NP_250392	O85640
NP_253697	NP_753153	P22235								O66614				P52477						NP_250392	O85642
NP_253697	NP_753154	P22235								O66614				P55111						NP_250393	O87459
NP_253698	NP_753155	P22235								O66614				P55111						NP_250393	P35530
NP_253698	NP_753156	P22235								O69251				P55117						NP_250396	P55714
NP_253699	NP_753157	P22235								O69466				P55118						NP_250396	P55719
NP_253699	NP_753158	P22235								O69466				P55118						NP_250397	P55720
NP_253727	NP_753159	P22235								O69466				P55123						NP_250397	P55721
NP_253727	NP_755458	P22235								O69466				P55128						NP_250407	P55722
NP_253728	NP_755459	P22235								O69466				P55128						NP_250407	P55723
NP_253728	NP_755460	P22235								O69466				P55129						NP_250416	Q1BZW4
NP_253729	NP_755461	P22235								O69466				P55129						NP_250416	Q1C0N4
NP_253729	NP_755462	P22235								O69466				P55130						NP_290283	Q1CE41
NP_253730	NP_755464	P22235								O73800				P55131						NP_290283	Q2NR59
NP_253730	NP_755465	P22235								O73800				P55714						NP_395169	Q2NTG8
NP_253731	NP_755466	P26948								O83018				P69973						NP_395169	Q2NVI9
NP_253731	NP_755467	P32015								O83307				P72415						NP_395170	Q2SH74
NP_269190	NP_755468	P32015								O83307				P72415						NP_395170	Q2TJ84
NP_269190	NP_757027	P32015								O83307				P74852						NP_395171	Q3JKU6
NP_273084	NP_757028	P32015								O83307				P74852						NP_395171	Q3JLH6
NP_273084	NP_757029	P32015								O83307				P75056						NP_395174	Q52476
NP_273085	NP_757030	P32015								O83307				P80152						NP_395174	Q54044
NP_273085	NP_757032	P32015								O83307				Q00951						NP_395175	Q55296
NP_273086	NP_757033	P32015								O83307				Q00951						NP_395175	Q56974
NP_273086	NP_757034	P32015								O87685				Q01251						NP_395176	Q663I7
NP_273087	NP_757035	P32015								O87807				Q04851						NP_395176	Q66FM4
NP_273087	NP_757036	P32015								O93421				Q04968						NP_395177	Q72WH7
NP_273088	NP_757037	P32015								O93421				Q06081						NP_395177	Q87P22
NP_273088	NP_757239	P32015								P00484				Q06228						NP_395178	STM2884
NP_273089	NP_757240	P32015								P00484				Q06228						NP_395178	STY3008
NP_273089	NP_757241	P39858								P00486				Q08790						NP_395179
NP_273090	NP_757242	P39858								P00486				Q09086						NP_395179
NP_273090	NP_757243	P39858								P00487				Q09087						NP_395180
NP_273091	NP_757244	P39858								P00487				Q09089						NP_395180
NP_273091	NP_757245	P39858								P00800				Q09090						NP_395181
NP_273092	NP_757247	P39858								P00800				Q0T9P0						NP_395181
NP_273092	NP_757248	P39858								P01021				Q43892						NP_395185
NP_273117	NP_813951	P39858								P01021				Q43892						NP_395185
NP_273117	NP_814266	P39858								P04971				Q43892						NP_395186
NP_273378	NP_814829	P39858								P04971				Q43892						NP_395186
NP_273378	NP_815739									P04971				Q44342						NP_395187
NP_273381	NP_816972									P04971				Q44645						NP_395187
NP_273381	NP_817031									P05057				Q44645						NP_395188
NP_273382	NP_879839									P05057				Q44675						NP_395188
NP_273382	NP_879898									P05620				Q44675						NP_395189
NP_273677	NP_879974									P05620				Q44676						NP_395189
NP_273677	NP_880302									P05806				Q44676						NP_395190
NP_274534	NP_880571									P05806				Q44738						NP_395190
NP_274534	NP_880572									P07641				Q44738						NP_395191
NP_274708	NP_880573									P07641				Q44936						NP_395191
NP_274708	NP_880574									P08838				Q44936						NP_395192
NP_274709	NP_880575									P08839				Q44957						NP_395192
NP_274709	NP_881287									P08988				Q44957						NP_395193
NP_274920	NP_938626									P08988				Q44959						NP_395193
NP_274920	NP_938628									P09885				Q44959						NP_395194
NP_274922	NP_938629									P09885				Q44960						NP_395194
NP_274922	NP_940341									P09958				Q44960						NP_395195
NP_274923	NP_940342									P09958				Q44961						NP_395195
NP_274923	NP_940344									P10051				Q44961						NP_395196
NP_282073	NP_940530									P10051				Q44974						NP_395196
NP_282073	NP_940533									P11504				Q44974						NP_403907
NP_282133	NP_940534									P11504				Q44975						NP_403907
NP_282133	YP_001007659									P15754				Q45034						NP_403909
NP_282281	YP_001007660									P16519				Q45034						NP_403909
NP_282281	YP_001007661									P16519				Q45039						NP_403911
NP_282282	YP_001007662									P18958				Q45039						NP_403911
NP_282282	YP_001007663									P19650				Q45191						NP_403912
NP_282283	YP_001007664									P19650				Q45191						NP_403912
NP_282283	YP_001007665									P20074				Q45194						NP_403913
NP_282284	YP_001007666									P20074				Q45194						NP_403913
NP_282284	YP_001007667									P20092				Q45195						NP_403914
NP_282285	YP_001007668									P20092				Q45195						NP_403914
NP_282285	YP_031852									P22610				Q45196						NP_403916
NP_282286	YP_031853									P22610				Q45196						NP_403916
NP_282286	YP_031854									P22615				Q46036						NP_403918
NP_282287	YP_033006									P22615				Q46036						NP_403918
NP_282287	YP_094653									P22616				Q46123						NP_403919
NP_282288	YP_094724									P22616				Q46123						NP_403919
NP_282288	YP_095551									P22782				Q46668						NP_403921
NP_282289	YP_095552									P22782				Q46716						NP_403921
NP_282289	YP_095553									P23181				Q46716						NP_403922
NP_282290										P23181				Q46716						NP_403922
NP_282290										P23181				Q46716						NP_403923
NP_282291										P23181				Q47262						NP_403923
NP_282291										P23188				Q47262						NP_403924
NP_282292										P23188				Q47958						NP_403924
NP_282292										P23188				Q47958						NP_403925
NP_282293										P23188				Q47958						NP_403925
NP_282293										P23364				Q47958						NP_460371
NP_282294										P23364				Q51397						NP_460371
NP_282294										P23377				Q51397						NP_460372
NP_282295										P23377				Q51487						NP_460372
NP_282295										P23388				Q51487						NP_460373
NP_282296										P23533				Q51487						NP_460373
NP_282296										P23533				Q51886						NP_460376
NP_282297										P23536				Q52081						NP_460376
NP_282297										P25309				Q52492						NP_460377
NP_282298										P25309				Q52492						NP_460377
NP_282298										P25910				Q52492						NP_460378
NP_282406										P25910				Q52492						NP_460378
NP_282406										P25960				Q52950						NP_460380
NP_282554										P26825				Q53891						NP_460380
NP_282554										P26825				Q55288						NP_460381
NP_282555										P26826				Q57272						NP_460381
NP_282555										P26826				Q57506						NP_460382
NP_282556										P27717				Q57506						NP_460382
NP_282556										P29119				Q5NFW3						NP_460383
NP_282557										P29119				Q98QL5						NP_460383
NP_282557										P29119				Q9KMC1						NP_460384
NP_282562										P29122				Q9KMF4						NP_460384
NP_282562										P29122				Q9KMJ6						NP_460385
NP_282563										P29808				YPO1913						NP_460385
NP_282563										P29808				YPO1913						NP_460386
NP_282564										P29990				YP_001007666						NP_460386
NP_282564										P30299				YP_001007666						NP_857921
NP_282565										P30432				YP_001007668						NP_857925
NP_282565										P31585				YP_001007668						NP_857926
NP_282566										P31585				YP_001026319						NP_857935
NP_282566										P31586				YP_001026319						NP_880879
NP_282567										P31586				YP_001058924						NP_880879
NP_282567										P31587				YP_001058924						NP_880881
NP_282568										P31698				YP_001066168						NP_880881
NP_282568										P31699				YP_001066168						NP_880882
NP_282570										P31700				YP_001080406						NP_880882
NP_282570										P31700				YP_001080406						NP_880883
NP_282571										P31701				YP_001116030						NP_880883
NP_282571										P31701				YP_001116030						NP_880884
NP_282572										P31704				YP_001348629						NP_880884
NP_282572										P31704				YP_001348629						NP_880885
NP_282573										P31704				YP_001465584						NP_880885
NP_282573										P31704				YP_001465584						NP_880887
NP_282574										P31705				YP_001583351						NP_880887
NP_282574										P31705				YP_001583351						NP_880888
NP_282575										P31705				YP_096679						NP_880888
NP_282575										P31705				YP_096679						NP_880889
NP_282576										P31711				YP_108401						NP_880889
NP_282576										P31712				YP_108401						NP_880891
NP_282577										P33566				YP_108403						NP_880891
NP_282577										P33589				YP_108403						NP_880892
NP_282578										P33589				YP_333452						NP_880892
NP_282578										P33589				YP_333452						NP_880904
NP_282579										P33589				YP_371057						NP_880904
NP_282579										P36328				YP_371057						NP_880905
NP_282580										P36642				YP_442964						NP_880905
NP_282580										P36642				YP_442964						NP_880907
NP_282581										P36883				YP_442966						NP_880907
NP_282581										P36883				YP_442966						O30527
NP_282582										P37177				YP_622885						O30527
NP_282582										P37177				YP_622885						O30527
NP_282583										P42014				YP_776581						O30527
NP_282583										P43922				YP_776581						O52128
NP_282584										P44805				YP_791220						O52128
NP_282584										P44805				YP_791220						O52128
NP_282585										P44805				YP_838976						O52128
NP_282585										P44805				YP_838976						O52130
NP_282586										P45595				YP_992988						O52130
NP_282586										P45597				YP_992988						O52130
NP_282587										P45616				ZP_01556718						O52130
NP_282587										P45616				ZP_01556718						O52136
NP_282588										P45616				ZP_01563887						O52136
NP_282588										P45616				ZP_01563887						O52136
NP_282616										P45617				ZP_01645454						O52136
NP_282616										P45794				ZP_01645454						O68258
NP_286006										P47668				ZP_01645970						O68258
NP_286006										P51183				ZP_01645970						O68258
NP_286007										P51183				ZP_01699155						O68258
NP_286007										P57296				ZP_01699155						O84566
NP_286008										P57296				ZP_02100626						O84566
NP_286008										P62577				ZP_02100626						O84566
NP_286009										P62577				ZP_02108904						O84566
NP_286009										P62579				ZP_02108904						O84567
NP_286010										P62579										O84567
NP_286010										P63239										O84567
NP_286011										P68515										O84567
NP_286011										P68515										O84568
NP_287515										P71154										O84568
NP_287515										P71154										O84568
NP_290259										P71154										O84568
NP_290259										P71154										O84580
NP_344916										P71154										O84580
NP_344916										P71154										O84580
NP_345414										P71154										O84580
NP_345414										P71154										O85300
NP_345446										P71154										O85636
NP_345446										P72640										O85636
NP_346601										P74872										O85640
NP_346601										P74872										O85640
NP_346612										P75168										O85640
NP_346612										P75168										O85640
NP_359024										P77439										O85640
NP_359024										P81661										O85640
NP_404896										P81661										O85642
NP_404896										P81661										O85642
NP_404897										P82981										O85642
NP_404897										P82981										O85642
NP_404899										P84787										O87459
NP_404899										P84787										O87459
NP_404900										P84788										P35530
NP_404900										P84788										P55714
NP_438494										P85109										P55719
NP_438494										P85109										P55719
NP_459538										P86171										P55720
NP_459538										PA3841										P55721
NP_459539										PA3841										P55722
NP_459539										Q01564										P55723
NP_459540										Q01565										Q1BZW4
NP_459540										Q01565										Q1C0N4
NP_459541										Q02736										Q1CE41
NP_459541										Q02736										Q2NR59
NP_459542										Q03026										Q2NTG8
NP_459542										Q03058										Q2NVI9
NP_459543										Q03058										Q2SH74
NP_459543										Q06277										Q2TJ84
NP_459544										Q06277										Q3JKU6
NP_459544										Q06277										Q3JLH6
NP_459545										Q06277										Q52476
NP_459545										Q06277										Q52476
NP_459547										Q06277										Q52476
NP_459547										Q06277										Q52476
NP_460110										Q06277										Q54044
NP_460110										Q28193										Q54044
NP_460111										Q28193										Q54044
NP_460111										Q41358										Q54044
NP_460112										Q41358										Q55296
NP_460112										Q41358										Q56974
NP_460114										Q41358										Q56974
NP_460114										Q41358										Q663I7
NP_460115										Q41358										Q66FM4
NP_460115										Q46525										Q72WH7
NP_460116										Q51448										Q87P22
NP_460116										Q51448										STM2884
NP_461448										Q51448										STM2884
NP_461448										Q51448										STY3008
NP_461449										Q51449										STY3008
NP_461449										Q51449
NP_461452										Q51451
NP_461452										Q51451
NP_462537										Q52177
NP_462537										Q52177
NP_462538										Q52177
NP_462538										Q52424
NP_462539										Q52424
NP_462539										Q52424
NP_462540										Q52424
NP_462540										Q54478
NP_462541										Q55235
NP_462541										Q55235
NP_462656										Q55235
NP_462656										Q55235
NP_465354										Q55235
NP_465354										Q55235
NP_466081										Q55235
NP_466081										Q55235
NP_490508										Q55435
NP_490508										Q55435
NP_490509										Q55435
NP_490509										Q55435
NP_490510										Q56740
NP_490510										Q56763
NP_490511										Q63415
NP_490511										Q63415
NP_645333										Q68749
NP_645333										Q8YJ96
NP_645334										Q91053
NP_645334										Q91053
NP_645335										Q9HY55
NP_645335										Q9PDH7
NP_645581										SA0983
NP_645581										SA0983
NP_646186										STY3008
NP_646186										STY3008
NP_647237										VC1450
NP_647237										VC1450
NP_647238										YPO1231
NP_647238										YPO1231
NP_647368										YPO1907
NP_647368										YPO1907
NP_647402										YPO2665
NP_647402										YPO2665
NP_647403										YPO2666
NP_647403										YPO2666
NP_647404										YPO2667
NP_647404										YPO2667
NP_647405										YP_001463602
NP_647405										YP_001463602
NP_647406										YP_094827
NP_647406										YP_094827
NP_647429										YP_095553
NP_647429										YP_095553
NP_663902										YP_695432
NP_663902										YP_695432
NP_663908										ZP_00708525
NP_663908										ZP_00708525
NP_688199										ZP_00717088
NP_688199										ZP_00717088
NP_688239										ZP_01174698
NP_688239										ZP_01174698
NP_753153										ZP_01175306
NP_753153										ZP_01175306
NP_753154
NP_753154
NP_753155
NP_753155
NP_753156
NP_753156
NP_753157
NP_753157
NP_753158
NP_753158
NP_753159
NP_753159
NP_755458
NP_755458
NP_755459
NP_755459
NP_755460
NP_755460
NP_755461
NP_755461
NP_755462
NP_755462
NP_755464
NP_755464
NP_755465
NP_755465
NP_755466
NP_755466
NP_755467
NP_755467
NP_755468
NP_755468
NP_757027
NP_757027
NP_757028
NP_757028
NP_757029
NP_757029
NP_757030
NP_757030
NP_757032
NP_757032
NP_757033
NP_757033
NP_757034
NP_757034
NP_757035
NP_757035
NP_757036
NP_757036
NP_757037
NP_757037
NP_757239
NP_757239
NP_757240
NP_757240
NP_757241
NP_757241
NP_757242
NP_757242
NP_757243
NP_757243
NP_757244
NP_757244
NP_757245
NP_757245
NP_757247
NP_757247
NP_757248
NP_757248
NP_813951
NP_813951
NP_814266
NP_814266
NP_814829
NP_814829
NP_815739
NP_815739
NP_816972
NP_816972
NP_817031
NP_817031
NP_879839
NP_879839
NP_879898
NP_879898
NP_879974
NP_879974
NP_880302
NP_880302
NP_880571
NP_880571
NP_880572
NP_880572
NP_880573
NP_880573
NP_880574
NP_880574
NP_880575
NP_880575
NP_881287
NP_881287
NP_938626
NP_938626
NP_938628
NP_938628
NP_938629
NP_938629
NP_940341
NP_940341
NP_940342
NP_940342
NP_940344
NP_940344
NP_940530
NP_940530
NP_940533
NP_940533
NP_940534
NP_940534
YP_001007659
YP_001007660
YP_001007661
YP_001007662
YP_001007663
YP_001007664
YP_001007665
YP_001007666
YP_001007667
YP_001007668
YP_031852
YP_031852
YP_031853
YP_031853
YP_031854
YP_031854
YP_033006
YP_033006
YP_094653
YP_094653
YP_094724
YP_094724
YP_095551
YP_095551
YP_095552
YP_095552
YP_095553
YP_095553
